# Supplementary material for: Egr1 Gene Expression as a Potential Biomarker for In Vitro Prediction of Ocular Toxicity
Source: MDPI journal article supplement (doi:10.3390/pharmaceutics13101584), 2021-09-29
Supplement: s1 [file s1]

# Supplementary Materials: *Egr1* Gene Expression as a Potential Biomarker for In Vitro Prediction of Ocular Toxicity

Da-Bin Hwang, Shin-Young Kim, Dong-Hoon Won, Changuk Kim, Yoo-Sub Shin, Jong-Hwan Park, Young-Jin Chun, Kyung-Min Lim, Jun-Won Yun

**Table S1.** Putative transcription factor binding sites in *Egr1* promoter region between the positions -477 and +36 (Top 3).

| Factor        | Start position | End position | Strand | Core match | Matrix match | Sequence <sup>a</sup> |
|---------------|----------------|--------------|--------|------------|--------------|-----------------------|
| SRF           | -473           | -459         | (+)    | 1.000      | 0.927        | ttCCATAttagggc        |
|               | -453           | -435         | (-)    | 1.000      | 0.951        | cttcccataTATGGccat    |
|               | -453           | -438         | (-)    | 1.000      | 0.979        | cttcCCATAtatggc       |
|               | -451           | -437         | (+)    | 1.000      | 0.985        | tcCCATAtatggcc        |
|               | -451           | -437         | (-)    | 1.000      | 0.987        | tcccataTATGGcc        |
|               | -450           | -435         | (+)    | 1.000      | 0.991        | cccataTATGGccat       |
| Elk-1         | -465           | -449         | (-)    | 1.000      | 0.888        | tagggCTTCCtgcttc      |
|               | -463           | -449         | (-)    | 0.938      | 0.928        | gggcTTCCTgcttc        |
|               | -310           | -296         | (-)    | 1.000      | 0.949        | cagcTTCCGccgcc        |
| c-ETS-1 (p54) | -462           | -452         | (-)    | 0.947      | 0.962        | ggctTCCTGc            |
|               | -169           | -159         | (-)    | 1.000      | 0.981        | aacaTCCGGc            |
|               | -94            | -84          | (-)    | 1.000      | 0.968        | cacgTCCGGg            |

<sup>a</sup>Capital letters indicate the positions in the sequence which match with the core sequence of the matrix, while the lower cases refer to the remaining position of a matrix.

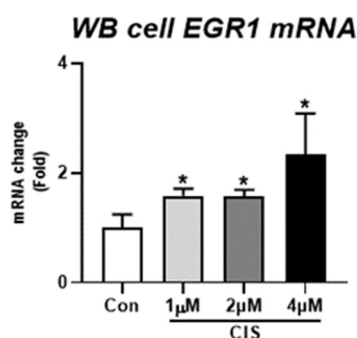

**Figure S1.** *Egr1* mRNA expression levels after cisplatin administration in WB-F344 cells. Values are expressed as relative mRNA expression that has been normalized to GAPDH. Data expressed as means  $\pm$  SD (\*\* $p < 0.01$ ).

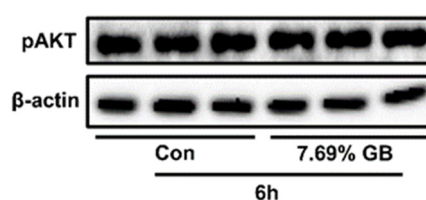

**Figure S2.** Effect of GB treatment on phosphorylation of Akt in human corneal epithelial cells. Human corneal epithelial cells were treated with GB for 10 min and incubated for 6 h.  $\beta$ -actin was used as loading control for protein-expression analysis.

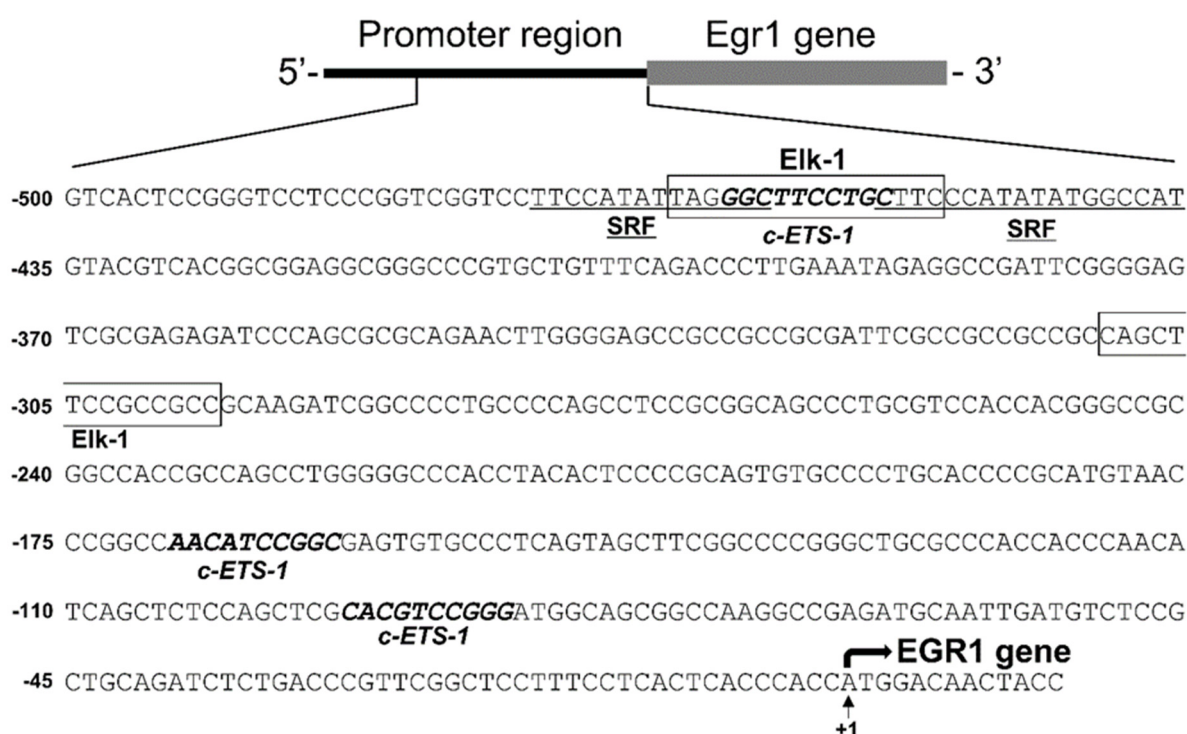

**Figure S3.** Promoter region of rat *Egr1* and putative binding sites for three transcription factors SRF (underlined), Elk-1 (labeled box), and c-ETS-1 (bold and italic).

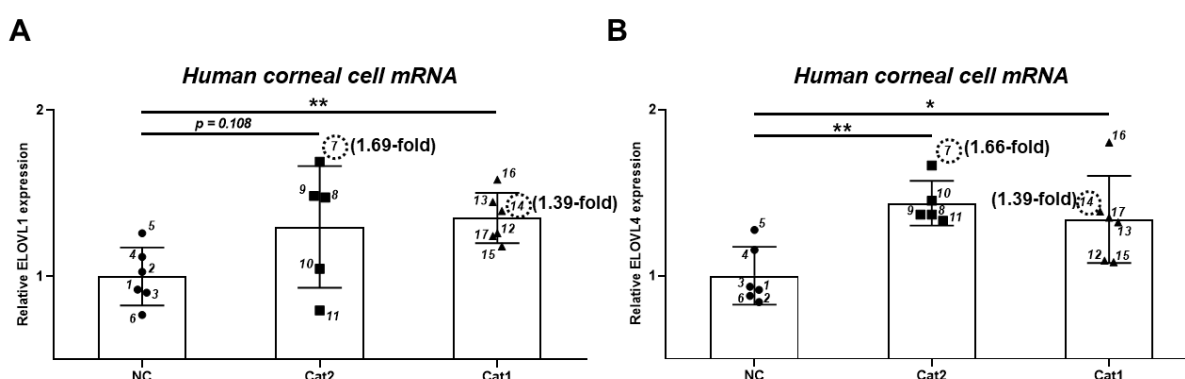

**Figure S4.** Changes of mRNA expressions of ELOVL1 and ELOVL4 in human corneal epithelial cells by 17 test substances from various chemical classes. Human corneal epithelial cells were treated with test chemical solution for 10 min and incubated for 6 h. Each data for ELOVL1 (A) and ELOVL4 (B) was measured by ddPCR. Data are expressed as mean  $\pm$  SD (\* $p$  < 0.05, \*\* $p$  < 0.01). 1: 2-Ethoxyethyl methacrylate; 2: Piperonyl butoxide; 3: 1-Ethyl-3-methylimidazolium ethylsulphate; 4: Potassium tetrafluoroborate; 5: Polyoxyl 40 hydrogenated castor oil; 6: Dipropyl disulphide; 7: 2-Methyl-1-

pentanol; 8: Diethyl toluamide; 9: 1,4-Dibutoxy benzene; 10: 2,4,11,13-Tetraazatetradecane diimidamide, N,N''-bis(4chlorophenyl)-3,12-diimino-, di-D-gluconate; 11: Gamma-butyrolactone; 12: (Ethylenediamine-propyl)-trimethoxysilane; 13: Tetraethylene glycol diacrylate; 14: 1,2-Benzisothiazol-3(2H)-one; 15: 3,5-Dimethyl-2,5-hexanediol; 16: Disodium 2,2'-([1,1'-biphenyl]-4,4'-diyldivinylene)bis-(benzenesulphonate); 17: Sodium oxalate; Cat1, serious damage; Cat2, mild irritant to irritant; NC, no damage.
